# Supplementary material for: Turn-on fluorescent sensor for the detection of lipopolysaccharides based on a novel bispyrenyl terephtalaldehyde-bis-guanylhydrazone
Source: Royal Society of Chemistry journal article supplement (doi:10.1039/c9nj00323a), 2019-01-01
Supplement: c9nj00323a1.pdf [file c9nj00323a1.pdf]

## SUPPORTING INFORMATION

### Turn-on fluorescent sensor for the detection of lipopolysaccharide based on a novel bispyrenyl terephthalaldehyde-bis-guanylhydrazone

Kriangsak Khownum,<sup>\*a</sup> Jariya Romsaiyud,<sup>b</sup> Suparerk Borwornpinyo,<sup>c,d</sup> Preedajit Wongkrasant,<sup>e</sup> Pawin Pongkorpsakol,<sup>e</sup> Chatchai Muanprasat,<sup>e,d</sup> Bundet Boekfa,<sup>f</sup> Tirayut Vilaivan,<sup>g</sup> Somsak Ruchirawat,<sup>h</sup> and Jumras Limtrakul<sup>i</sup>

<sup>a</sup>Faculty of Medicine, King Mongkut's Institute of Technology Ladkrabang, Bangkok, 10520, Thailand

<sup>b</sup>Department of Chemistry and Center of Excellence for Innovation in Chemistry, Faculty of Science, Ramkhamhaeng University, Huamark, Bangkok, 10240, Thailand

<sup>c</sup>Department of Biotechnology and <sup>d</sup>Excellent Center for Drug Discovery, and <sup>e</sup>Department of Physiology Faculty of Science, Mahidol University, Bangkok 10400, Thailand

<sup>f</sup>Chemistry Department, Faculty of Liberal Arts and Science, Kasetsart University Kamphaeng Saen Campus, Nakhon Pathom 73140, Thailand

<sup>g</sup>Department of Chemistry, Faculty of Science, Chulalongkorn University, Bangkok 10330, Thailand

<sup>h</sup>Chulabhorn Research Institute, Vipavadee-Rangsit Highway, Bangkok 10210, Thailand

<sup>i</sup>Department of Materials Science and Engineering, School of Molecular Science and Engineering, Vidyasirimedhi Institute of Science and Technology, Rayong 21210, Thailand

\*Correspondence to Kriangsak Khownum, kriangsak.kh@kmitl.ac.th

| Table of Contents                                                         | Page |
|---------------------------------------------------------------------------|------|
| 1. Spectroscopic data of synthesized compounds                            | S2   |
| 2. Absorption spectra of <b>BPTG</b> before and after the addition of LPS | S10  |
| 3. The photophysical properties of <b>BPTG</b>                            | S10  |
| 4. Results of computational experiments                                   | S11  |

## 1. Spectroscopic data of synthesized compounds

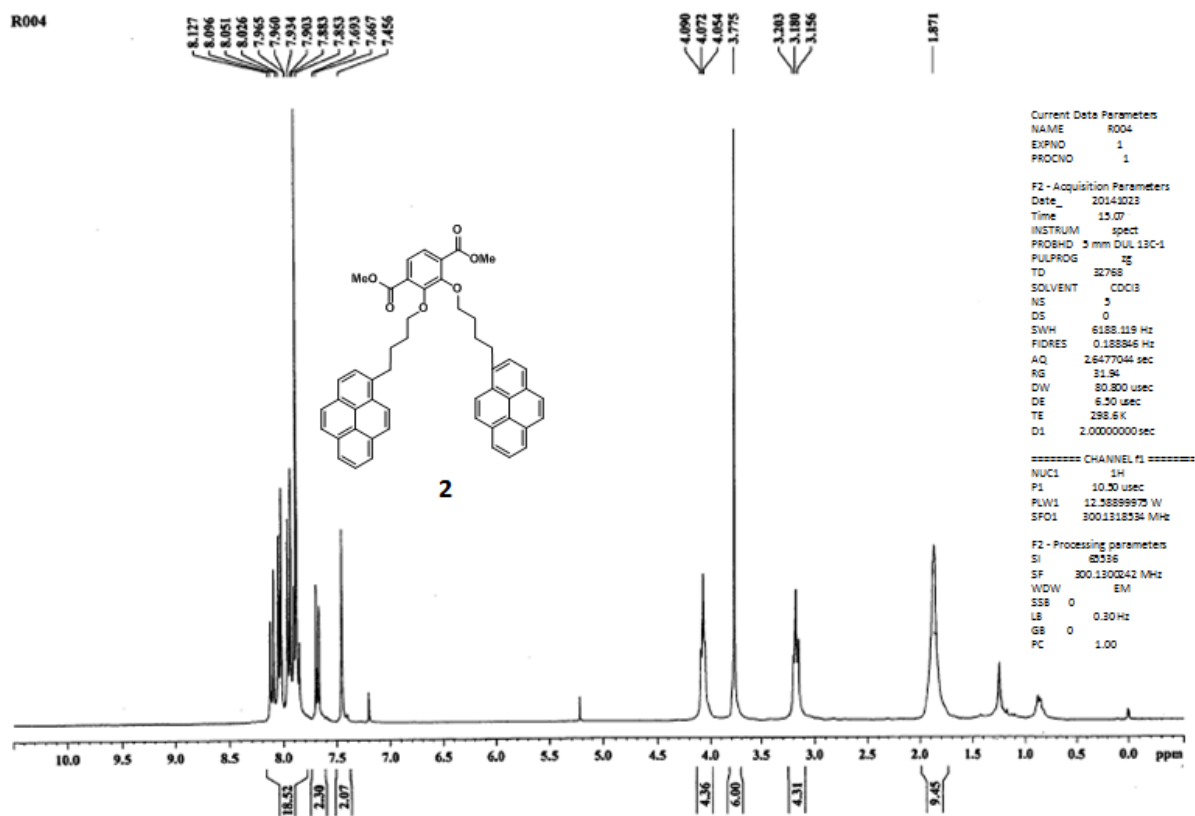

Fig. S1  $^1\text{H}$  NMR spectrum of dimethyl 2,3-bis(4-(pyren-1-yl)butoxy)terephthalate (**2**)

R004

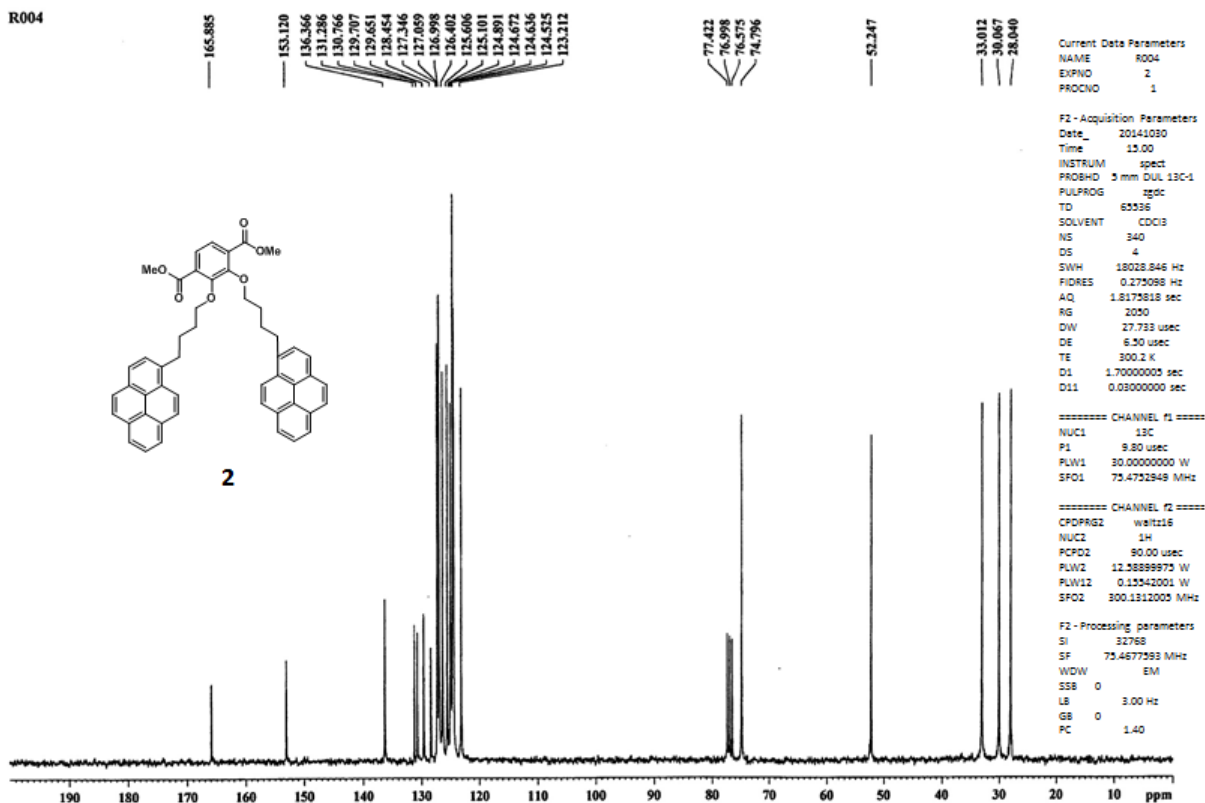

Fig. S2  $^{13}\text{C}$  NMR spectrum of dimethyl 2,3-bis(4-(pyren-1-yl)butoxy)terephthalate (2)

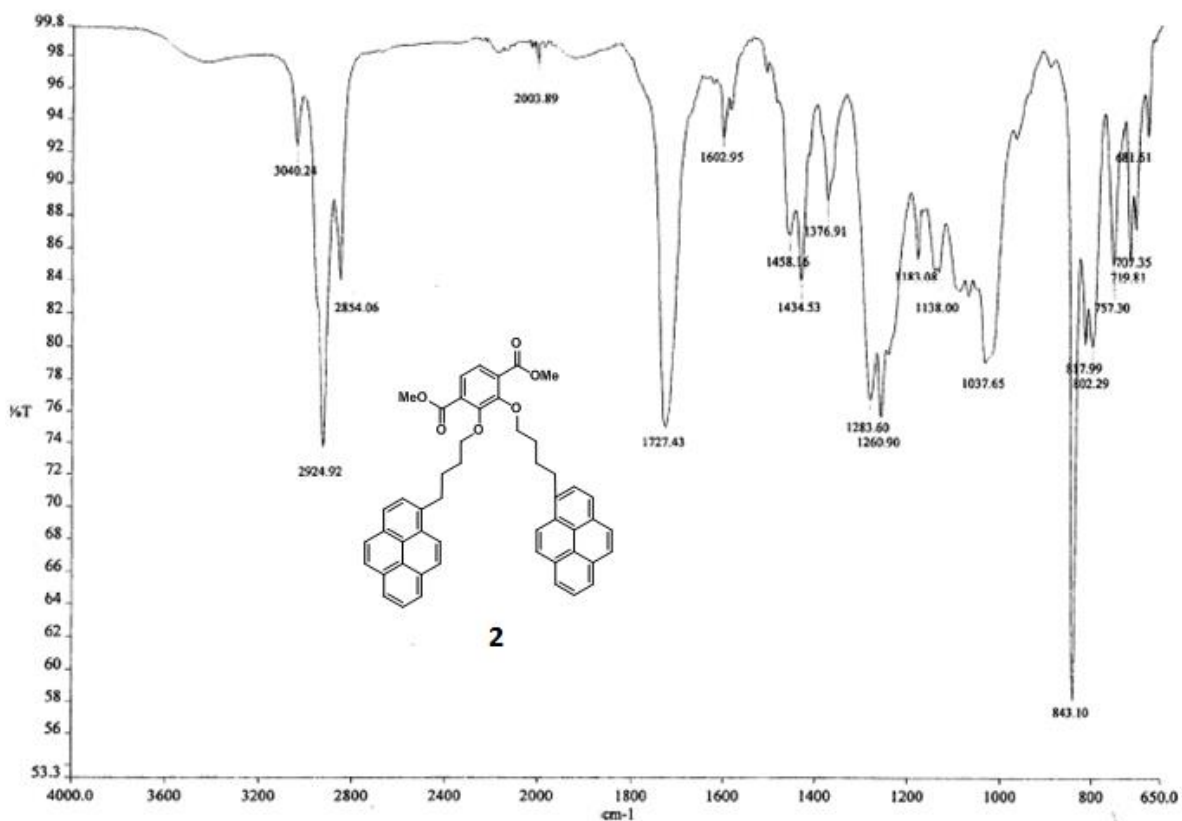

Fig. S3 IR spectra of dimethyl 2,3-bis(4-(pyren-1-yl)butoxy)terephthalate (2)

# Mass Spectrum List Report

## Analysis Info

Analysis Name TOFCRI018719 Kittisak ROO4 E+.d  
 Method Nitirat ESI pos 2014-1.m  
 Sample Name ESIpos

Acquisition Date 10/31/2014 10:31:19 AM  
 Operator Administrator  
 Instrument micrOTOF 74

## Acquisition Parameter

Source Type ESI  
 Scan Range n/a  
 Scan Begin 100 m/z  
 Scan End 1000 m/z

Ion Polarity Positive  
 Capillary Ext 110.0 V  
 Hexapole RF 150.0 V  
 Skimmer 1 35.0 V  
 Hexapole 1 22.9 V

Set Corrector Fill 64 V  
 Set Pulsar Pull 405 V  
 Set Pulsar Push 405 V  
 Set Reflector 1300 V  
 Set Flight Tube 9000 V  
 Set Detector TOF 1860 V

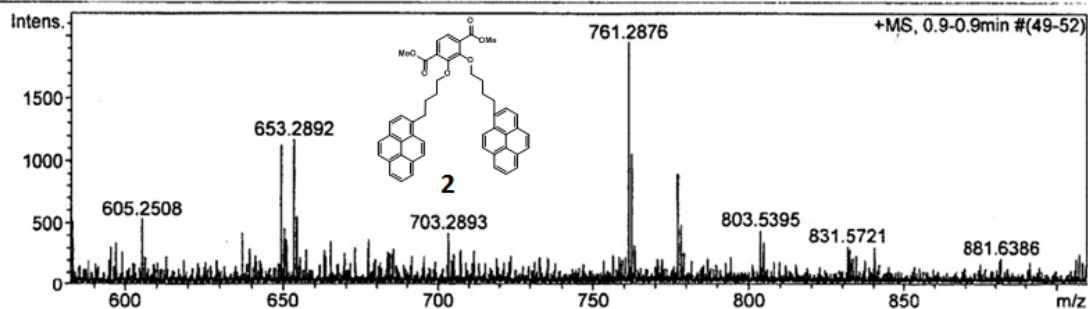

Fig. S4 ESI-MS of dimethyl 2,3-bis(4-(pyren-1-yl)butoxy)terephthalate (2)

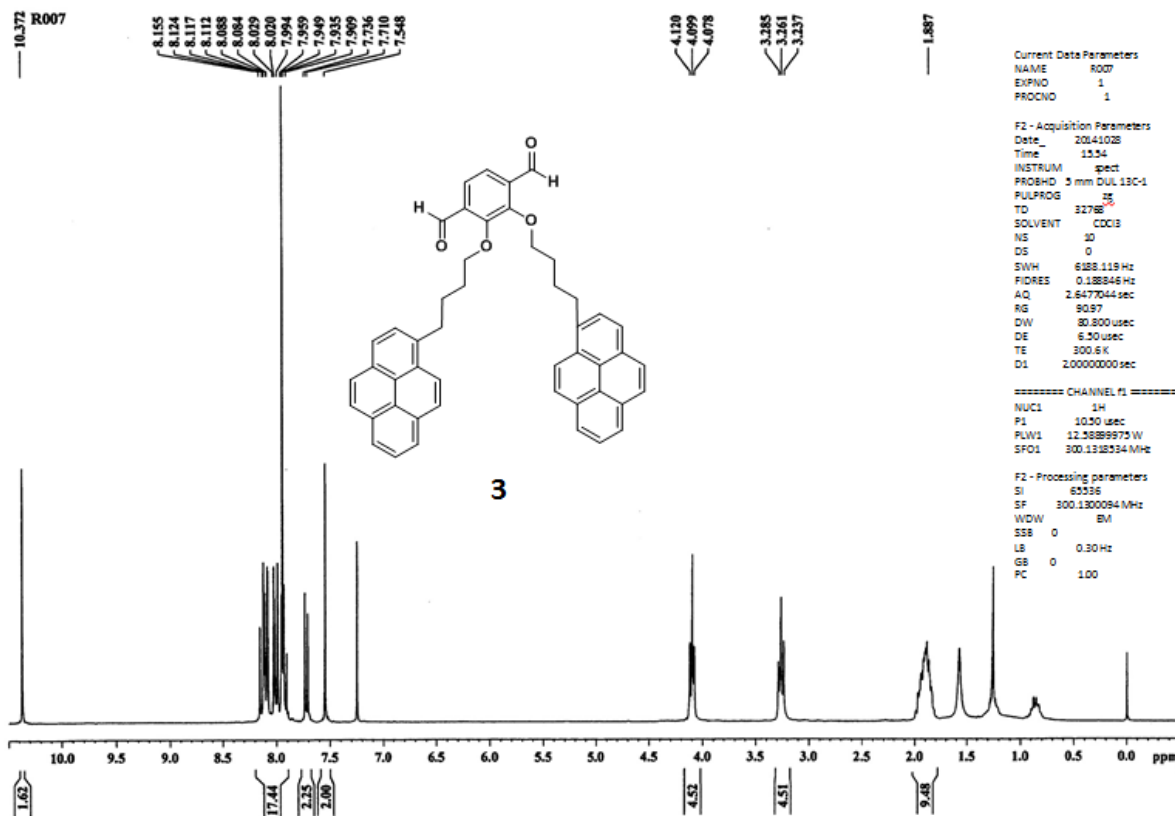

Fig. S5 <sup>1</sup>H NMR spectrum of 2,3-bis(4-(pyren-1-yl)butoxy)terephthalaldehyde (3)

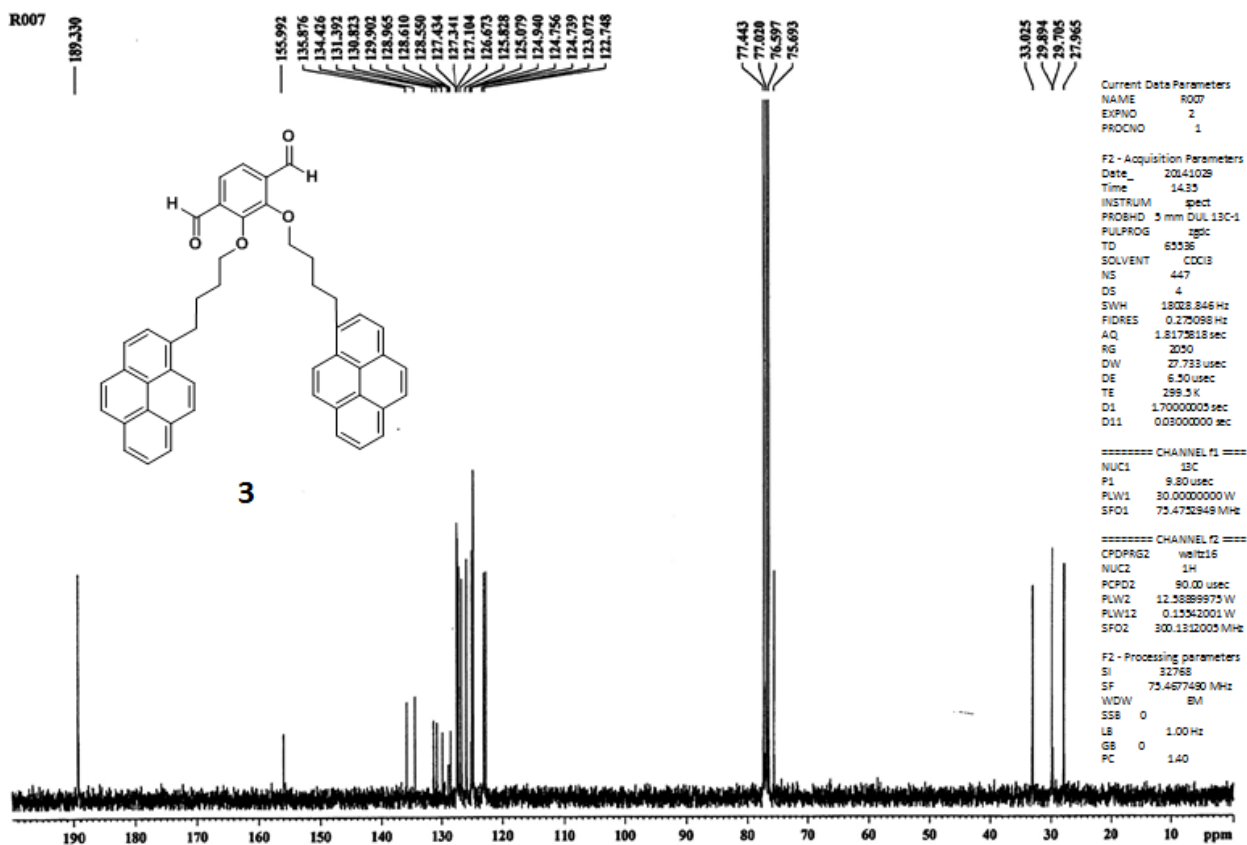

Fig. S6  $^{13}\text{C}$  NMR spectrum of 2,3-bis(4-(pyren-1-yl)butoxy)terephthalaldehyde (3)

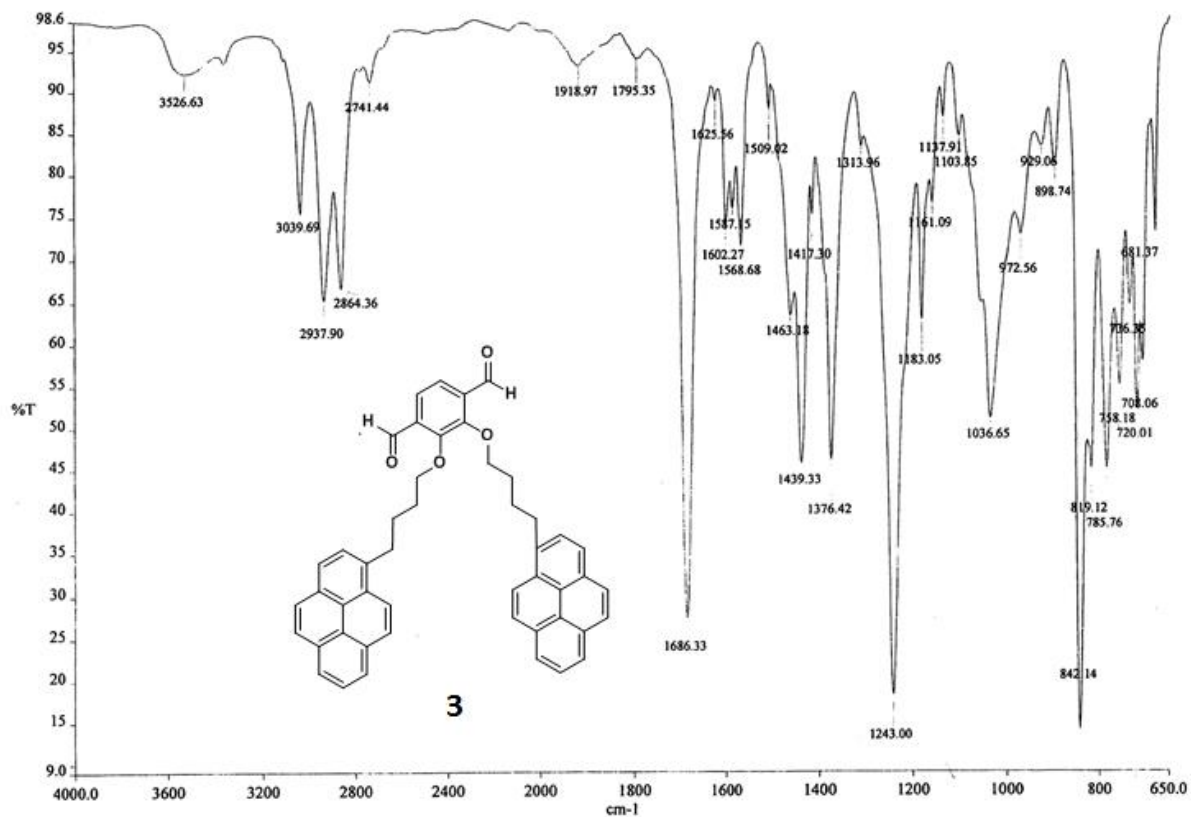

Fig. S7 IR spectra of 2,3-bis(4-(pyren-1-yl)butoxy)terephthalaldehyde (3)

# Mass Spectrum List Report

## Analysis Info

Analysis Name TOFCRI018749-1 Kittisak R007a E+.d  
 Method Nitirat ESI pos 2014-1.m  
 Sample Name ESIpos

Acquisition Date 11/4/2014 1:06:08 PM  
 Operator Administrator  
 Instrument micrOTOF 74

## Acquisition Parameter

Source Type ESI  
 Scan Range n/a  
 Scan Begin 100 m/z  
 Scan End 950 m/z

Ion Polarity Positive  
 Capillary Exit 110.0 V  
 Hexapole RF 200.0 V  
 Skimmer 1 35.0 V  
 Hexapole 1 22.9 V

Set Corrector Fill 64 V  
 Set Pulsar Pull 405 V  
 Set Pulsar Push 405 V  
 Set Reflector 1300 V  
 Set Flight Tube 9000 V  
 Set Detector TCF 1870 V

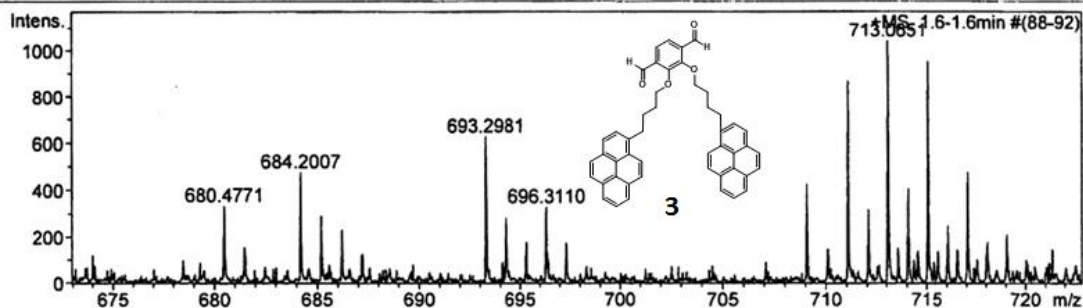

Fig. S8 ESI-MS of 2,3-bis(4-(pyren-1-yl)butoxy)terephthalaldehyde (3)

R010

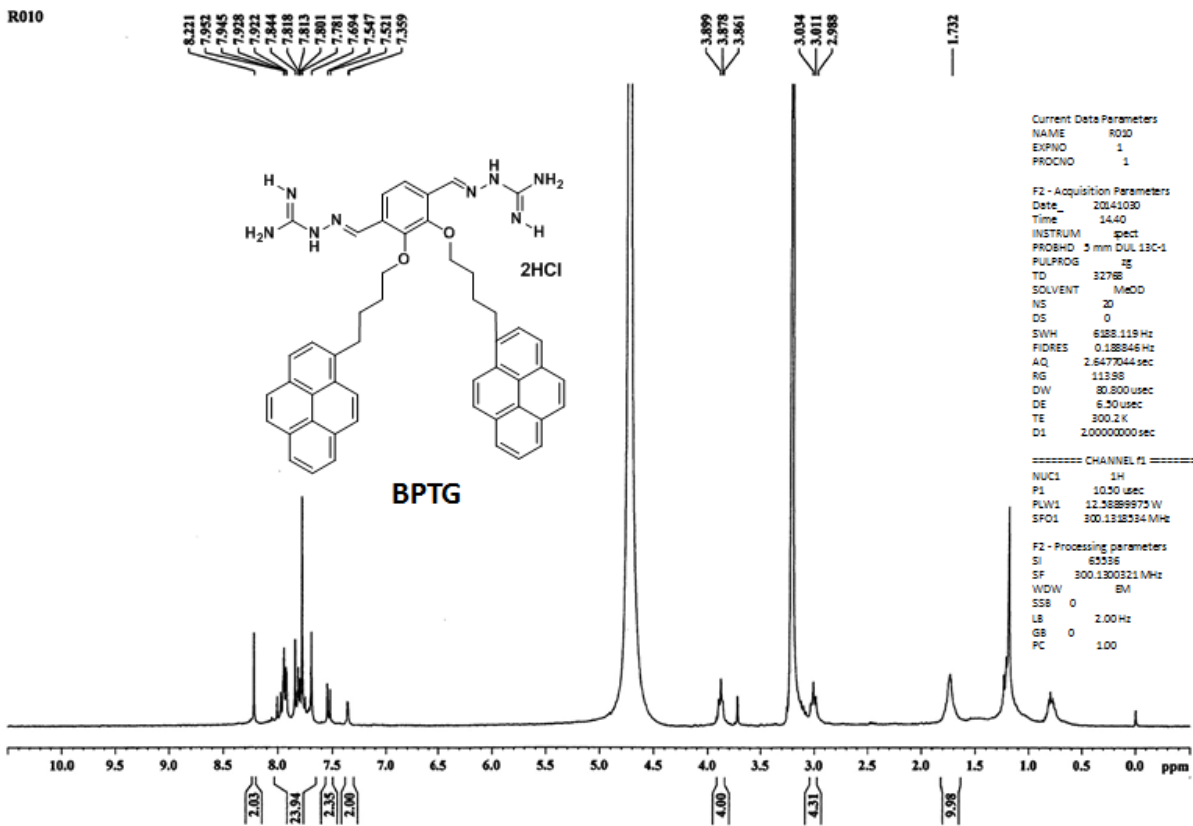

Fig. S9 <sup>1</sup>H NMR spectrum of 2E,2'E)-2,2'-((2,3-bis(4-(pyren-1-yl)butoxy)-1,4-phenylene)bis(methanylylidene))bis(hydrazinecarboximidamide) (BPTG)

R010

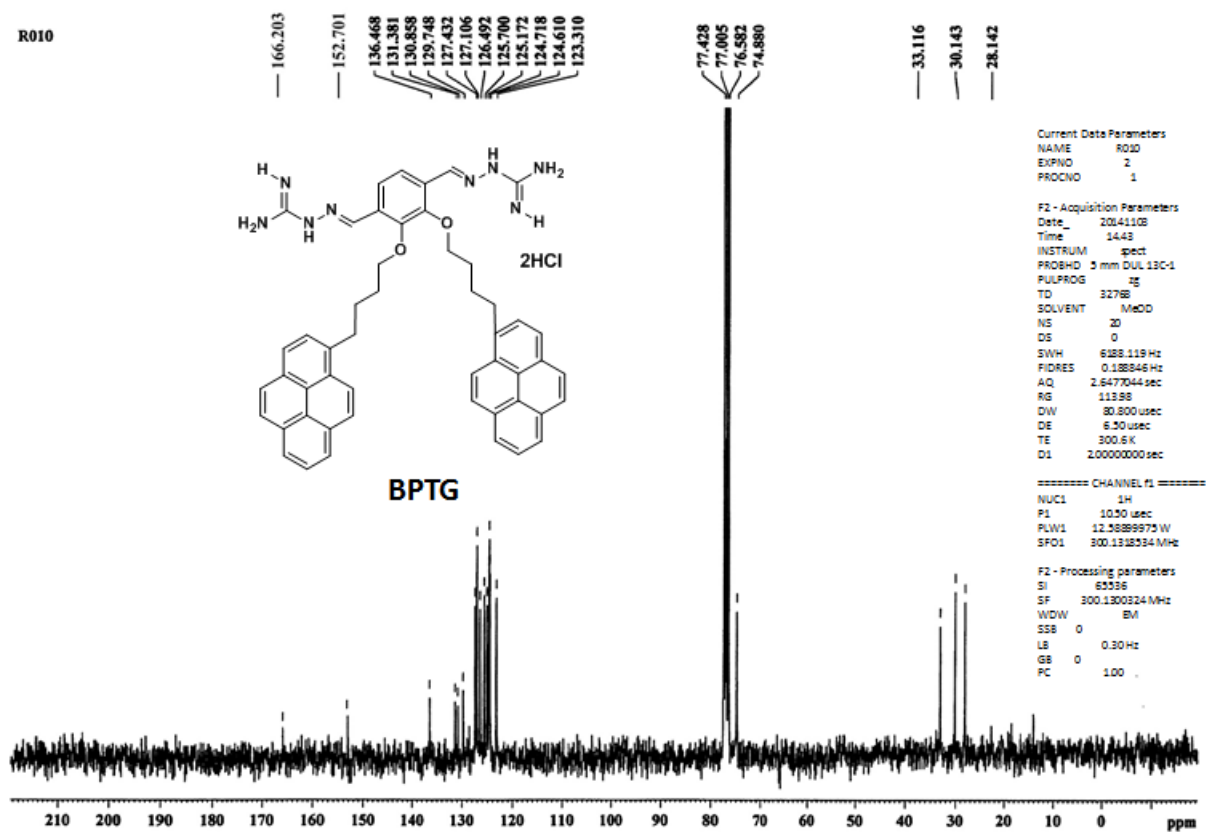

Fig. S10 <sup>13</sup>C NMR spectrum of 2E,2'E)-2,2'-((2,3-bis(4-(pyren-1-yl)butoxy)-1,4-phenylene)bis(methanylylidene))bis(hydrazinecarboximidamide) (BPTG)

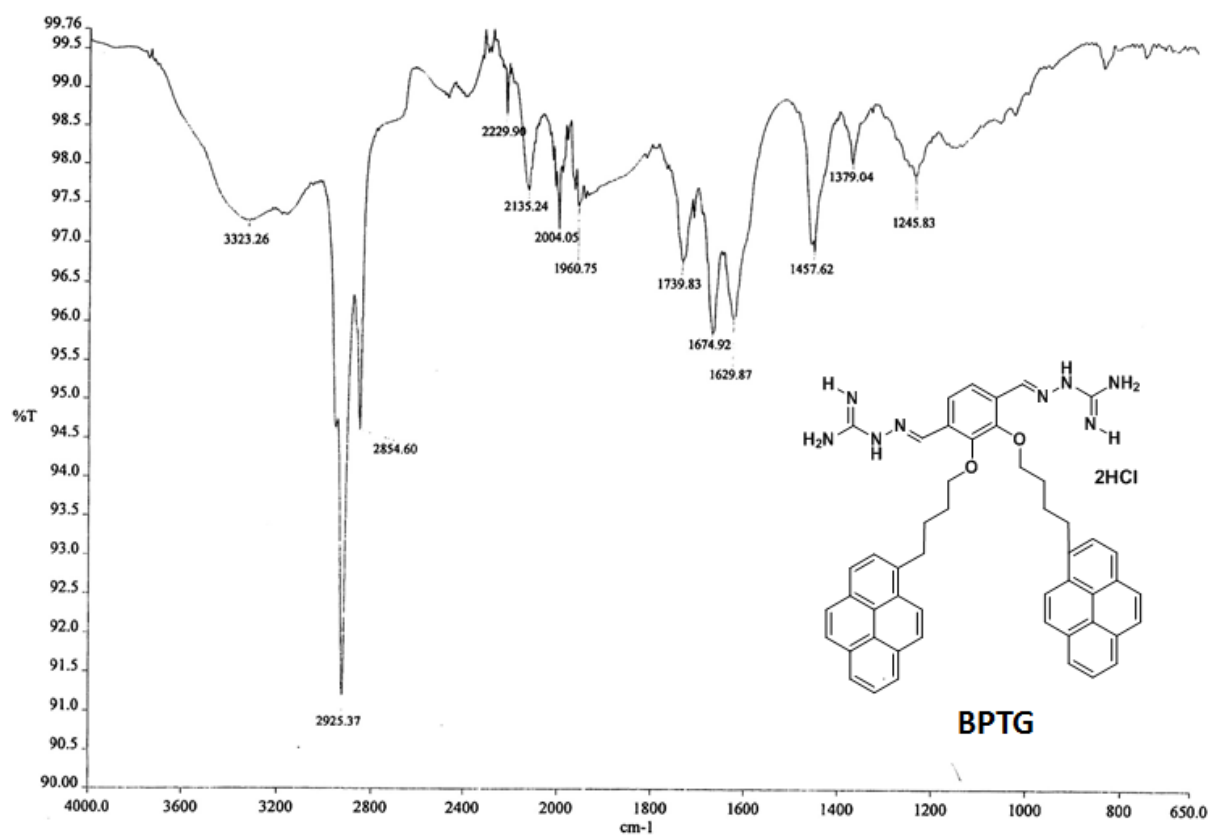

**Fig. S11** IR spectra of 2E,2'E)-2,2'-((2,3-bis(4-(pyren-1-yl)butoxy)-1,4-phenylene)bis(methanylylidene))bis(hydrazinecarboximidamide) (BPTG)



# Mass Spectrum List Report

## Analysis Info

Analysis Name D:\Data\yanling\Acq000003.d  
Method esi\_pos\_low 09072015-yanling-2.m  
Sample Name BPTG  
Comment

Acquisition Date 7/9/2015 3:52:45 PM

Operator BDAL@DE  
Instrument / Ser# micrOTOF-Q II 10411

## Acquisition Parameter

|             |            |                       |           |                  |           |
|-------------|------------|-----------------------|-----------|------------------|-----------|
| Source Type | ESI        | Ion Polarity          | Positive  | Set Nebulizer    | 0.4 Bar   |
| Focus       | Not active | Set Capillary         | 4500 V    | Set Dry Heater   | 180 °C    |
| Scan Begin  | 50 m/z     | Set End Plate Offset  | -500 V    | Set Dry Gas      | 4.0 l/min |
| Scan End    | 1500 m/z   | Set Collision Cell RF | 150.0 Vpp | Set Divert Valve | Waste     |

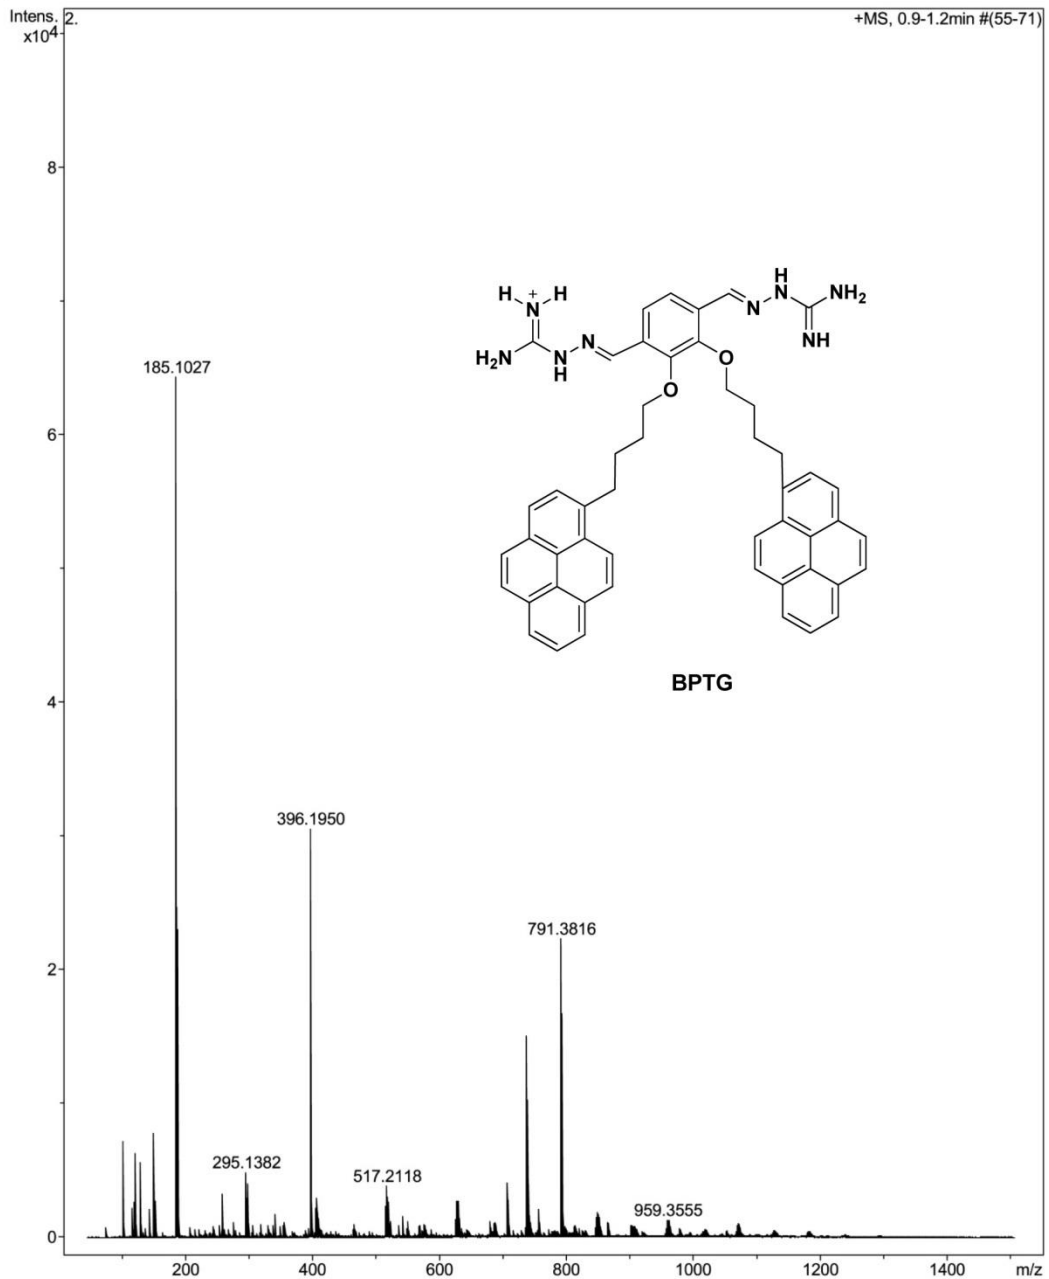

**Fig. S12** ESI-MS of 22E,2'E)-2,2'-((2,3-bis(4-(pyren-1-yl)butoxy)-1,4-phenylene)bis(methanylylidene))bis(hydrazinecarboximidamide) (**BPTG**)

## 2. Absorption spectra of BPTG before and after the addition of LPS

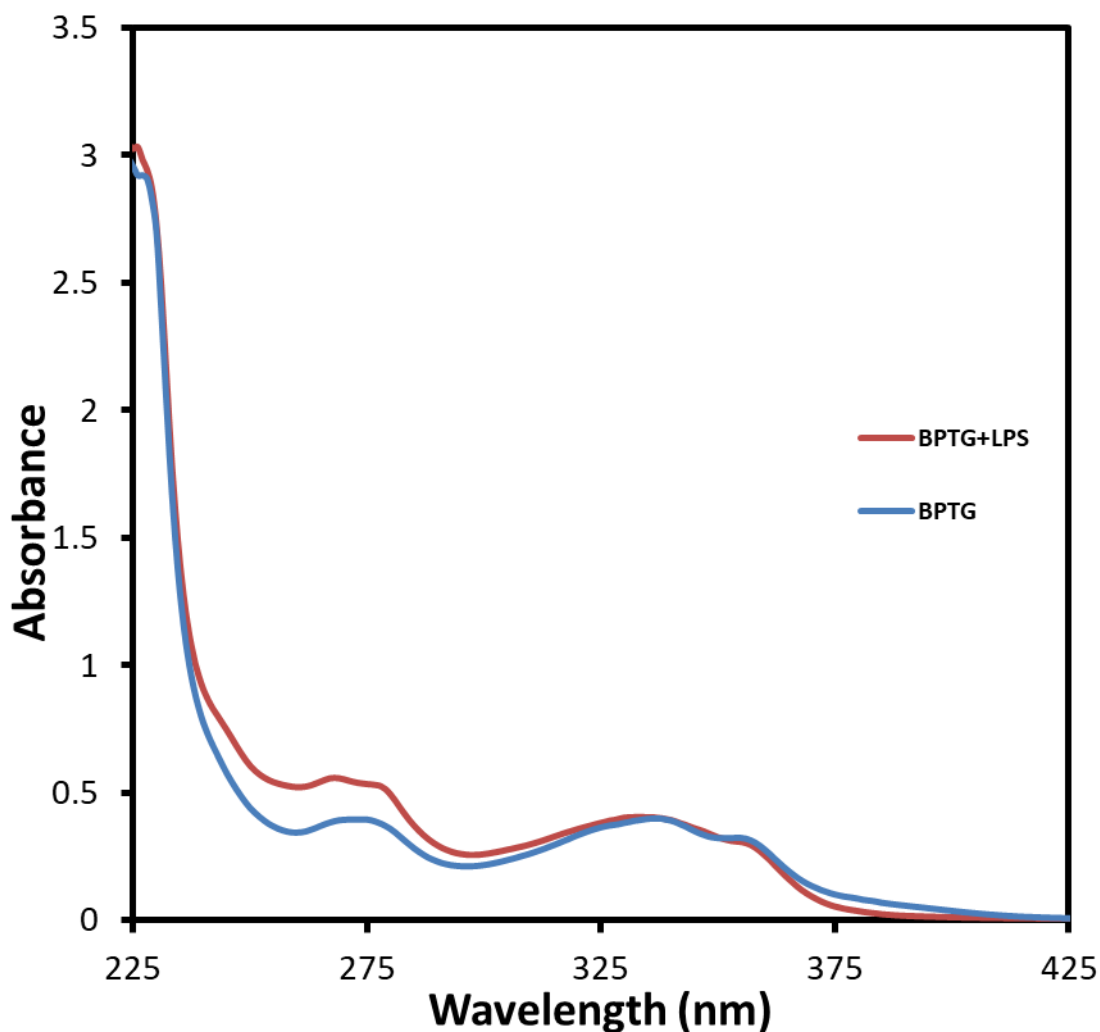

**Fig. S13** Absorption spectra of **BPTG** (5 μM) in a solution of DMSO/HEPES (v/v = 1/6) buffer (10 mM, pH 7.4) before and after addition of LPS (10 μM). The UV-vis absorbance maximum at 342 nm is corresponding to the pyrenyl band.

## 3. The photophysical properties of BPTG

**Table S1.** Photophysical properties of BPTG in a solution of DMSO/HEPES (v/v = 1/6) buffer (10 mM, pH 7.4) before and after addition of LPS.

| Compound   | Absorption                  |                                             | Emission                         |                              |
|------------|-----------------------------|---------------------------------------------|----------------------------------|------------------------------|
|            | $\lambda_{\max}(\text{nm})$ | $\varepsilon (\text{M}^{-1}\text{cm}^{-1})$ | $\lambda_{\text{em}}(\text{nm})$ | $\Phi_{\text{F}}^{\text{a}}$ |
| BPTG       | 342                         | 76,320                                      | 485                              | 0.072                        |
| BPTG + LPS | 342                         | 78,537                                      | 485                              | 0.090                        |

a : Quinine sulfate in 0.1 M H<sub>2</sub>SO<sub>4</sub> ( $\Phi_{\text{F}} = 0.54$ ) was used as standard

#### 4. Results of computational experiments

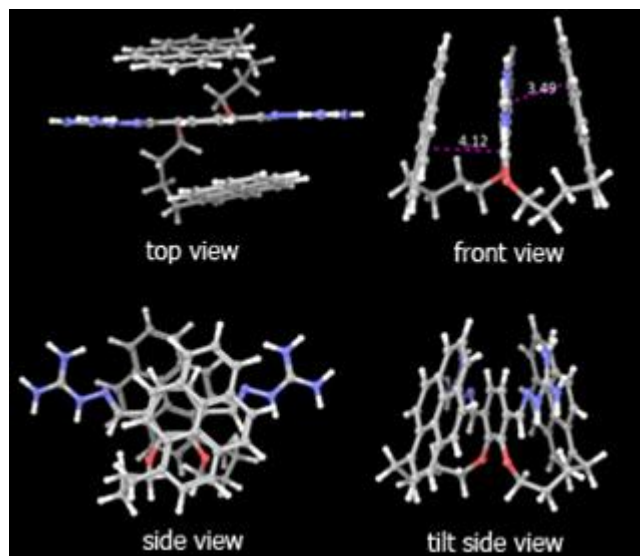

**Fig. S14** Sandwich stacking conformation of **BPTG** like a butterfly-like skeleton

**Table S2.** **BPTG**'s conformations and their total energies, HOMO's energies, LUMO's energies and band gap of (a) sandwich- (b) semi- and (c) open-stacking optimized with the M06-2X functional in Gaussian 09 program.

| <b>BPTG's Conformation</b> | 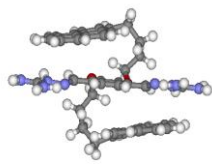 |  |  |
|----------------------------|-------------------------------------------------------------------------------------|-------------------------------------------------------------------------------------|---------------------------------------------------------------------------------------|
|                            | <b>sandwich-</b>                                                                    | <b>semi-</b>                                                                        | <b>open-</b>                                                                          |
| Total Energy (au)          | -2521.337149                                                                        | -2521.330214                                                                        | -2521.312463                                                                          |
| Relative Energy (kcal/mol) | <b>0.00</b>                                                                         | <b>4.35</b>                                                                         | <b>15.49</b>                                                                          |
| LUMO (au)                  | -0.21554                                                                            | -0.22098                                                                            | -0.23608                                                                              |
| HOMO (au)                  | -0.38725                                                                            | -0.36041                                                                            | -0.32508                                                                              |
| band gap (eV)              | 4.67257252                                                                          | 3.79416916                                                                          | 2.421868                                                                              |

The M06 functional was developed by Zhao and Truhlar.<sup>1-3</sup> The M06 functional, which take care the van der Waals interaction, has been successful studied on the adsorption and reaction on several material such as zeolite,<sup>4</sup> alloy metal,<sup>5</sup> porphyrin<sup>6</sup> and metal-organic framework.<sup>7</sup> We optimized all structures with Gaussian 09 program.<sup>8</sup>

## References

- (1) Zhao, Y.; Schultz, N. E.; Truhlar, D. G. "Design of density functionals by combining the method of constraint satisfaction with parametrization for thermochemistry, thermochemical kinetics, and noncovalent interactions" *J. Chem. Theory Comput.* **2006**, *2*, 364-82.
- (2) Zhao, Y.; Truhlar, D. G. "The M06 suite of density functionals for main group thermochemistry, thermochemical kinetics, noncovalent interactions, excited states, and transition elements: Two new functionals and systematic testing of four M06-class functionals and 12 other functionals" *Theor. Chem. Acc.* **2008**, *120*, 215-41.
- (3) Zhao, Y.; Truhlar, D. G. "Benchmark data for interactions in zeolite model complexes and their use for assessment and validation of electronic structure Methods" *J. Phys. Chem. C* **2008**, *112*, 6860-8.
- (4) Boekfa, B.; Choomwattana, S.; Khongpracha, P.; Limtrakul, J. "Effects of the Zeolite Framework on the Adsorptions and Hydrogen-Exchange Reactions of Unsaturated Aliphatic, Aromatic, and Heterocyclic Compounds in ZSM-5 Zeolite: A Combination of Perturbation Theory (MP2) and a Newly Developed Density Functional Theory (M06-2X) in ONIOM Scheme" *Langmuir* **2009**, *25*, 12990-9.
- (5) Boekfa, B.; Pahl, E.; Gaston, N.; Sakurai, H.; Limtrakul, J.; Ehara, M. "C-Cl Bond Activation on Au/Pd Bimetallic Nanocatalysts Studied by Density Functional Theory and Genetic Algorithm Calculations" *J. Phys. Chem. C* **2014**, *118*, 22188-96.
- (6) Maitarad, P.; Namuangruk, S.; Zhang, D.; Shi, L.; Li, H.; Huang, L.; Boekfa, B.; Ehara, M. "Metal-Porphyrin: A Potential Catalyst for Direct Decomposition of N<sub>2</sub>O by Theoretical Reaction Mechanism Investigation" *Environ. Sci. Technol.* **2014**, *48*, 7101-10.
- (7) Maihom, T.; Choomwattana, S.; Khongpracha, P.; Probst, M.; Limtrakul, J. "Formaldehyde encapsulated in lithium-decorated metal-organic frameworks: A density functional theory study" *ChemPhysChem* **2012**, *13*, 245-9.
- (8) Frisch, M. J.; Trucks, G. W.; Schlegel, H. B.; Scuseria, G. E.; Robb, M. A.; Cheeseman, J. R.; Scalmani, G.; Barone, V.; Mennucci, B.; Petersson, G. A.; Nakatsuji, H.; Caricato, M.; Li, X.; Hratchian, H. P.; Izmaylov, A. F.; Bloino, J.; Zheng, G.; Sonnen Trucks, G. W.; Schlegel, H. B.; Scuseria, G. E.; Robb, M. A.; Cheeseman, J. R.; Scalmani, G.; Barone, V.; Mennucci, B.; Petersson, G. A.; Nakatsuji, H.; Caricato, M.; Li, X.; Hratchian, H. P.; Izmaylov, A. F.; Bloino, J.; Zheng, G.; Sonnenberg, J. L.; Hada, M.; Ehara, M.; Toyota, K.; Fukuda, R.; Hasegawa, J.; Ishida, M.; Nakajima, T.; Honda, Y.; Kitao, O.; Nakai, H.; Vreven, T.; Montgomery, J. A., Jr.; Peralta, J. E.; Ogliaro, F.; Bearpark, M.; Heyd, J. J.; Brothers, E.; Kudin, K. N.; Staroverov, V. N.; Kobayashi, R.; Normand, J.; Raghavachari, K.; Rendell, A.; Burant, J. C.; Iyengar, S. S.; Tomasi, J.; Cossi, M.; Rega, N.; Millam, N. J.; Klene, M.; Knox, J. E.; Cross, J. B.; Bakken, V.; Adamo, C.; Jaramillo, J.; Gomperts, R.; Stratmann, R. E.; Yazyev, O.; Austin, A. J.; Cammi, R.; Pomelli, C.; Ochterski, J. W.; Martin, R. L.; Morokuma, K.; Zakrzewski, V. G.; Voth, G. A.; Salvador, P.; Dannenberg, J. J.; Dapprich, S.; Daniels, A. D.; Farkas, Ö.; Foresman, J. B.; Ortiz, J. V.; Cioslowski, J.; Fox, D. J. *Gaussian 09, Gaussian, Inc., Wallingford CT.* **2009**.
